# Supplementary material
Source: PubMed Central journal article supplement (PMC2971598)
Supplement: pp.110.158857_1.pdf [file pp.110.158857_1.pdf]

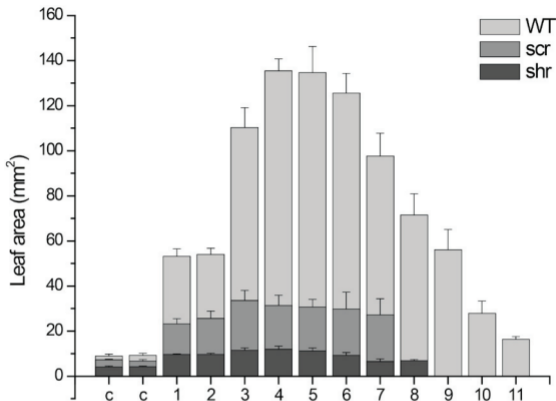

**Supplemental Figure S1.** Leaf series of *shr* and *scr* mutants.

Area measurements of leaf series of wild-type, *scr-3* and *shr-6* plants grown on soil and harvested before bolting (c=cotyledons). Error bars represent SE (n≥5).

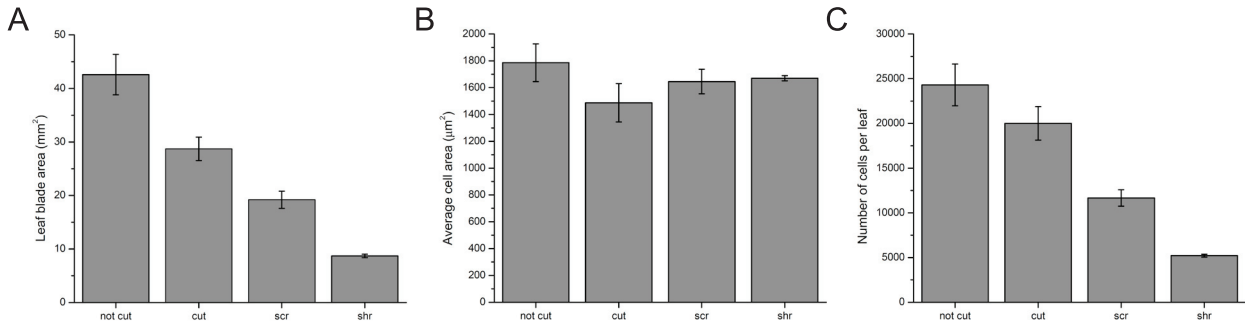

**Supplemental Figure S2.** The effect of cutting the root system in WT plants on leaf growth compared to *shr* and *scr* mutants.

Roots of WT plants were cut at 2 cm under the hypocotyl every three days after germination. At 24 days after sowing leaves 1 and 2 of normal-grown and de-rooted plants were harvested and compared to *scr-3* and *shr-6* leaves. **(A)** Leaf blade area. **(B)** Average cell size of the abaxial epidermis. **(C)** Number of epidermal cells per leaf. Error bars represent SE (n=5).

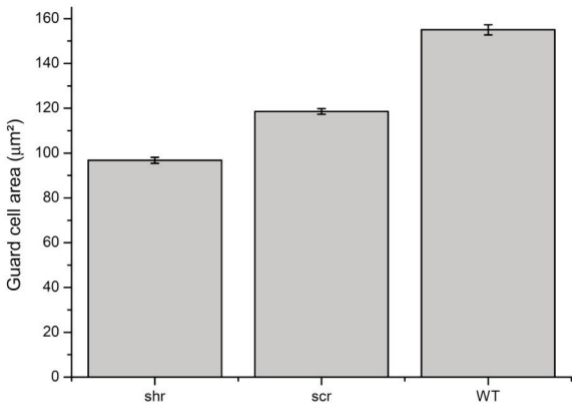

**Supplemental Figure S3.** Guard cell areas in *shr* and *scr* mutants.

Average guard cell size in the abaxial epidermis of *shr-6*, *scr-3* and wild-type leaves at 24 DAS. Error bars represent SE.

**Supplemental Table 1.** Top ten of most differentially expressed genes in *shr* and *scr* shoot transcriptomes.

| nr. | <i>shr</i> shoot |        |     | <i>scr</i> shoot |       |     |
|-----|------------------|--------|-----|------------------|-------|-----|
|     | AGI-code         | FC     |     | AGI-code         | FC    |     |
| 1   | AT3G08860        | 20.18  | *   | AT5G48850        | 8.22  | *   |
| 2   | AT5G48850        | 19.26  | *   | AT3G49580        | 7.41  | *   |
| 3   | AT3G49580        | 19.22  | *   | AT4G36700        | -6.41 | *   |
| 4   | AT5G59310        | 16.13  | * S | AT3G08860        | 5.96  | *   |
| 5   | AT4G36700        | -14.91 | *   | AT2G44460        | 5.70  | * S |
| 6   | AT1G73010        | 14.20  |     | AT5G03545        | 4.86  | *   |
| 7   | AT5G03545        | 13.11  | *   | AT5G26220        | 4.76  |     |
| 8   | AT2G44460        | 12.95  | * S | AT1G17700        | -4.25 |     |
| 9   | AT1G61800        | 12.06  |     | AT3G05690        | 3.80  |     |
| 10  | AT2G39330        | 9.73   |     | AT5G59310        | 3.72  | * S |

(FC) fold change; (\*) recurrent in table; (S) expression peak during S-phase according to Menges et al. (2003).

**Supplemental Table 2.** Expression of A, B, and C-type subunits of the nuclear transcription factor Y family.

| AGI-code  | gene name | FC <i>scr</i> | FC <i>shr</i> | p-value  |
|-----------|-----------|---------------|---------------|----------|
| At5g12840 | NF-YA1    | -1,04         | 1,07          | 5,13E+00 |
| At3g05690 | NF-YA2    | 3,80          | 4,55          | 4,38E-09 |
| At1g72830 | NF-YA3    | 2,69          | 3,54          | 4,61E-07 |
| At2g34720 | NF-YA4    | 1,22          | 1,45          | 2,52E-01 |
| At1g54160 | NF-YA5    | 2,02          | 2,48          | 6,02E-04 |
| At3g14020 | NF-YA6    | 2,29          | 3,30          | 4,73E-03 |
| At1g30500 | NF-YA7    | 1,59          | 2,65          | 1,90E-03 |
| At1g17590 | NF-YA8    | 1,80          | 2,31          | 4,62E-05 |
| At3g20910 | NF-YA9    | 1,22          | 1,36          | 1,02E-01 |
| At5g06510 | NF-YA10   | 2,36          | 5,20          | 2,28E-07 |
| At2g38880 | NF-YB1    | -1,08         | 1,10          | 1,46E-01 |
| At5g47640 | NF-YB2    | NA            | NA            | NA       |
| At4g14540 | NF-YB3    | -1,14         | -1,12         | 3,50E+00 |
| At1g09030 | NF-YB4    | 1,04          | -1,09         | 6,39E-01 |
| At2g47810 | NF-YB5    | -1,05         | -1,18         | 3,92E-03 |
| At5g47670 | NF-YB6    | NA            | NA            | NA       |
| At2g13570 | NF-YB7    | 1,09          | -1,16         | 7,76E-03 |
| At2g37060 | NF-YB8    | -1,43         | -1,24         | 7,45E-03 |
| At1g21970 | NF-YB9    | -1,01         | -1,16         | 2,73E-04 |
| At3g53340 | NF-YB10   | -1,09         | -1,08         | 4,72E-02 |
| At2g27470 | NF-YB11   | 1,12          | 1,12          | 1,68E+01 |
| At5g08190 | NF-YB12   | -1,03         | 1,10          | 4,31E+00 |
| At5g23090 | NF-YB13   | -1,00         | 1,12          | 6,82E-01 |
| At3g48590 | NF-YC1    | NA            | NA            | NA       |
| At1g56170 | NF-YC2    | 1,15          | 1,51          | 1,13E-01 |
| At1g54830 | NF-YC3    | -1,13         | -1,03         | 1,86E-01 |
| At5g63470 | NF-YC4    | NA            | NA            | NA       |
| At5g50490 | NF-YC5    | NA            | NA            | NA       |
| At5g50480 | NF-YC6    | -1,10         | 1,01          | 1,15E+00 |
| At5g50470 | NF-YC7    | -1,08         | -1,11         | 2,42E+00 |
| At5g27910 | NF-YC8    | 1,03          | -1,13         | 2,21E+00 |
| At1g08970 | NF-YC9    | -1,02         | 1,01          | 2,09E+00 |
| At1g07980 | NF-YC10   | -1,02         | 1,08          | 1,20E-03 |
| At3g12480 | NF-YC11   | -1,10         | -1,15         | 1,77E-02 |
| At5g38140 | NF-YC12   | -1,05         | -1,10         | 6,81E+00 |
| At5g43250 | NF-YC13   | NA            | NA            | NA       |

(FC) fold change; (NA) not on array.

**Supplemental Table 3.** Primer sequences used for Q-RT-PCR.

| AGI-code  | gene name / description                                       | forward primer            | reverse primer           |
|-----------|---------------------------------------------------------------|---------------------------|--------------------------|
| AT3G48750 | CDKA                                                          | ATTGCGTATTGCCACTCTCATAGG  | TCCTGACAGGGATACCGAATGC   |
| AT3G50000 | CKA2                                                          | ACCACCATTAACGTGCGTCAAC    | GATCTTGGCGAGAGAATCGGTATC |
| AT5G44200 | CBP20                                                         | GAGCATCTACAACGGTTTACATTGG | TAGGCCGGTCATCGAGAATAGTC  |
| AT4G37490 | CYCB1;1                                                       | CCTGGTGGAGTGGTTGATTGATG   | CGACATGAGAAGAGCACTGAGAC  |
| AT4G37650 | SHR                                                           | ACCACAACCATCACAAACCACAAC  | CGAAGGACGGAGGAGTTTGAGG   |
| -         | overlap between SHR cds and transposon in <i>shr-3</i> mutant | AGAGACAGCGAGGAAGTG        | AATTAAGTACTGACTCCTTTGAC  |
| -         | over transposon in <i>shr-3</i> mutant                        | GTCGGATTCCACGGAGAG        | ATCAGGACTGTACCATCG       |
| AT5G59970 | H4                                                            | ACCAAATTGCGTGTTCCATTG     | ATGTCTGGTCGTGGAAAGGGAG   |
| AT5G16250 | -                                                             | GCTCTGTCTCTGTTCTCATCTTCAC | TCTTCATCGCAACGCCATCAC    |
| AT1G70210 | CYCD1;1                                                       | GCGAACGAGTTACCTTCTCTATCC  | GCTCAATCCGTCACACCAAGTC   |
| AT4G34160 | CYCD3;1                                                       | CGTTCGTAGACCACATTATCAGGAG | CGGAGATTACAGAGAGGAGGAGAC |
| AT5G10440 | CYCD4;2                                                       | CCTAGTGGAAAAGCTTGGACTG    | TTAGCCTCAAACACGAACATGG   |
| AT4G37630 | CYCD5;1                                                       | TTGGTTCGATCTCTTGGTGGAC    | TTTCCGGTGGAGGTGTCATATG   |
| AT4G03270 | CYCD6;1                                                       | GCGCTCTGTTACTCCTTTCTCC    | CGCCTGCAATCACCGATGG      |
| AT3G48160 | DEL1                                                          | GCCGTTACTTCTCCTTCTTCC     | CGTCTCTCCACTCCTAATTTCCG  |
| AT5G14960 | DEL2                                                          | GCAGGCACTTCTGAGAGTAAC     | ATGGTTGGTAAAGAGTAGAAAGGG |
| AT3G01330 | DEL3                                                          | ACACAGAGCAGGAATCGAAACC    | TCCGTGAAATGCCCAAGAAGAC   |
| AT5G02470 | DPA                                                           | GCAAGAACAGAAGCAAGAACAGAAC | CGGTCAGCGAGTATCAATGGATC. |
| AT5G03415 | DPB                                                           | ATCACCGTTGTTACATCTACTAGCG | TTGAGAACCAGCATCATCACCTTG |
| AT2G36010 | E2Fa                                                          | GCTTTCGCCTCAACAAAACCTC    | CCCGATCTACAACACCACAACC   |
| AT5G22220 | E2Fb                                                          | CCGATGAAAGAGGAAAGCACCG    | CGCCTACCTCTGATCGAAACC    |
| AT1G47870 | E2Fc                                                          | TCCCTCTTCTCCTTCTTCATCTTCC | CCATGTAACGGCGGTGTATCTC   |
| AT3G12280 | RBR                                                           | CTCATAAGTCGCCTGCTGCTAAG   | TTGCTGTGCTCACTGGTGTGG    |
| AT1G02970 | WEE1                                                          | AAGTGGGGATGGCTTGCAAG      | ACCGTCCATTCTTCAACACC     |
